# Supplementary material for: Differentiation of Benign Angiomatous and Microcystic Meningiomas with Extensive Peritumoral Edema from High Grade Meningiomas with Aid of Diffusion Weighted MRI
Source: Hindawi journal article supplement (doi:10.1155/2014/650939), 2014-01-01
Supplement: f1 [file 650939.f1.pdf]

## Supplemental

| Case#             | Tumor type               | Sex | Age       | Location              | Edema Index Vol<br>edema/Vol tumor | Normalized<br>tumor ADC | CBV Perfusion AV<br>oval 30mm2 |
|-------------------|--------------------------|-----|-----------|-----------------------|------------------------------------|-------------------------|--------------------------------|
| 1                 | Angiomatoid              | M   | 66        | R frontal             | 4.4                                | 1.2                     | 11.3                           |
| 2                 | Angiomatoid              | F   | 68        | L parietal            | 7.0                                | 2.5                     | nd                             |
| 3                 | Angiomatoid              | M   | 50        | L frontal             | 1.2                                | 1.1                     | 6.0                            |
| 4                 | Microcystic              | M   | 70        | L frontal             | 4.4                                | 3.4                     | 26.0                           |
| 5                 | Microcystic              | F   | 63        | Parafalcine           | 3.0                                | 1.3                     | nd                             |
| 6                 | Microcystic              | F   | 60        | L frontal             | 1.0                                | 1.3                     | 18.3                           |
| 7                 | Microcystic              | F   | 40        | R frontal             | 1.1                                | 3.9                     | 15.0                           |
| 8                 | Microcystic              | M   | 70        | R occipital           | 1.0                                | 2.9                     | 8.0                            |
| 9                 | Microcystic              | M   | 81        | L frontal             | 4.2                                | 1.5                     | 25.2                           |
| 10                | Microcystic              | F   | 78        | Bifrontal             | 3.5                                | 1.1                     | nd                             |
| 11                | Microcystic              | F   | 67        | R frotal              | 1.9                                | 1.0                     | nd                             |
| 12                | Microcystic              | F   | 88        | R frontal             | 2.7                                | 1.1                     | nd                             |
| 13                | Angiomatoid +microcystic | F   | 68        | L frontal             | 1.0                                | 1.4                     | 15.0                           |
| 14                | Angiomatoid +microcystic | F   | 54        | R temporal            | 1.7                                | 1.8                     | 11.3                           |
| 15                | Angiomatoid +microcystic | F   | 53        | L frontal             | 2.5                                | 1.4                     | 15.0                           |
| 16                | Angiomatoid +microcystic | F   | 53        | R frontal             | 6.4                                | 1.7                     | 7.8                            |
| 17                | Angiomatoid +microcystic | F   | 49        | L frontal             | 5.7                                | 4.5                     | 16.0                           |
| 18                | Angiomatoid +microcystic | F   | 50        | R frontal             | 1.2                                | 1.7                     | nd                             |
| 19                | Angiomatoid +microcystic | F   | 43        | R frontal             | 2.1                                | 2.1                     | 13.0                           |
| 20                | Angiomatoid +microcystic | M   | 36        | R parietal            | 14.5                               | 1.6                     | nd                             |
| 21                | Angiomatoid +microcystic | F   | 32        | L frontal             | 3.8                                | 1.9                     | nd                             |
| 22                | Angiomatoid +microcystic | F   | 74        | L frontal             | 1.9                                | 1.4                     | nd                             |
| <b>Group Mean</b> |                          |     | <b>60</b> |                       | <b>3.5</b>                         | <b>1.9</b>              | <b>14.5</b>                    |
| 23                | Anaplastic               | F   | 50        | R fronto-<br>temporal | 4.0                                | 1.2                     | 11.5                           |
| 24                | Anaplastic               | M   | 65        | L temp occipital      | 1.9                                | 1.2                     | 9.0                            |
| 25                | Anaplastic               | F   | 50        | R temporal            | 5.5                                | 1.4                     | 9.8                            |
| 26                | Anaplastic               | M   | 65        | L occipital           | 18.5                               | 1.4                     | 5.4                            |
| 27                | Anaplastic               | M   | 86        | R fronto-parietal     | 1.4                                | 1.1                     | 14.0                           |
| 28                | Anaplastic               | F   | 50        | R fronto-parietal     | 2.6                                | 1.2                     | 10.0                           |
| 29                | Anaplastic               | F   | 49        | R froto-parietal      | 3.6                                | 1.3                     | 12.5                           |
| 30                | Anaplastic               | M   | 64        | parietal occipital    | 2.7                                | 1.1                     | nd                             |
| 31                | Anaplastic               | F   | 85        | R frontal             | 1.9                                | 1.1                     | nd                             |
| 32                | Atypical                 | M   | 53        | Olfactory groove      | 1.8                                | 1.0                     | 9.0                            |
| 33                | Atypical                 | M   | 61        | R hemisphere          | 3.6                                | 1.1                     | nd                             |
| 34                | Atypical                 | F   | 30        | L frontal             | 3.4                                | 1.1                     | 7.0                            |
| 35                | Atypical                 | M   | 62        | L temporal            | 2.7                                | 1.2                     | 12.0                           |
| 36                | Atypical                 | M   | 68        | R frontal             | 3.9                                | 1.0                     | 14.7                           |
| 37                | Atypical                 | M   | 75        | L frontal             | 1.9                                | 1.1                     | 18.7                           |
| 38                | Atypical                 | M   | 65        | R hemisphere          | 3.8                                | 0.9                     | 7.0                            |
| 39                | Atypical                 | F   | 49        | Occipital             | 2.6                                | 1.3                     | 17.9                           |
| 40                | Atypical                 | F   | 91        | L frontal             | 1.3                                | 1.0                     | 8.6                            |
| 41                | Atypical                 | F   | 75        | L temporal            | 3.8                                | 1.2                     | 20.0                           |
| 42                | Atypical                 | F   | 48        | R frontal             | 1.9                                | 1.1                     | 19.0                           |
| 43                | Atypical                 | F   | 34        | R frontal             | 1.6                                | 1.1                     | nd                             |
| 44                | Atypical                 | F   | 69        | R frontal             | 1.8                                | 0.9                     | nd                             |
| 45                | Atypical                 | F   | 67        | R temporal            | 1.7                                | 0.6                     | 19.0                           |
| 46                | Atypical                 | F   | 69        | R frontal             | 2.0                                | 1.0                     | 20.0                           |
| 47                | Atypical                 | M   | 53        | Frontal               | 1.4                                | 0.9                     | 4.3                            |
| 48                | Atypical                 | M   | 42        | R frontal             | 1.7                                | 1.2                     | nd                             |

|                   |                     |   |           |                  |            |            |             |
|-------------------|---------------------|---|-----------|------------------|------------|------------|-------------|
| 49                | Atypical            | F | 87        | L temporal       | 1.2        | 0.9        | nd          |
| 50                | Atypical            | M | 66        | R frontal        | 3.3        | 1.1        | 11.0        |
| 51                | Atypical            | F | 52        | R temporal       | 1.4        | 1.1        | 12.0        |
| 52                | Atypical            | F | 35        | L frontotemporal | 3.8        | 1.0        | nd          |
| 53                | Atypical            | F | 56        | R frontal        | 4.6        | 1.0        | nd          |
| 54                | Atypical            | F | 56        | L frontal        | 2.1        | 0.8        | nd          |
| 55                | Atypical            | F | 82        | R frontal        | 1.1        | 1.0        | nd          |
| 56                | Atypical            | M | 68        | L frontal        | 2.6        | 0.8        | nd          |
| 57                | Atypical            | F | 66        | L occipital      | 3.2        | 0.9        | nd          |
| 58                | Atypical            | F | 67        | R frontal        | 3.2        | 1.1        | nd          |
| 59                | Atypical            | M | 35        | L frontal        | 2.8        | 0.8        | nd          |
| <b>Group Mean</b> |                     |   | <b>61</b> |                  | <b>3.0</b> | <b>1.1</b> | <b>12.4</b> |
| 60                | Meningotheliomatous | F | 33        | R parietal       | 2.4        | 1.2        | 8.2         |
| 61                | Meningotheliomatous | F | 66        | Bi parietal      | 1.0        | 1.3        | 15.0        |
| 62                | Meningotheliomatous | F | 66        | Bifrontal        | 1.0        | 1.4        | 8.5         |
| 63                | Meningotheliomatous | M | 60        | L parietal       | 3.0        | 1.4        | 7.8         |
| 64                | Meningotheliomatous | F | 71        | R parietal       | 1.3        | 1.0        | 12.3        |
| 65                | Meningotheliomatous | F | 56        | L frontal        | 1.1        | 2.0        | 14.0        |
| 66                | Meningotheliomatous | F | 74        | L temporal       | 1.4        | 1.8        | nd          |
| 67                | Meningotheliomatous | F | 54        | L frontal        | 1.0        | 1.6        | 9.9         |
| 68                | Fibrous             | M | 87        | Bifrontal        | 1.2        | 1.9        | 11.0        |
| 69                | Fibrous             | M | 49        | L frontal        | 1.0        | 4.3        | 7.2         |
| 70                | Fibrous             | M | 78        | R frontal        | 1.0        | 1.5        | 15.4        |
| <b>Group Mean</b> |                     |   | <b>63</b> |                  | <b>1.4</b> | <b>1.8</b> | <b>10.9</b> |

Supplemental Table 1. Seventy cases divided within three groups based on histology.

Demographic information and site of tumor provided. Values for edema index, ADC value and CBV perfusion provided for each tumor. Nd indicates no data available for cases in which a perfusion sequence was not performed. Group means are provided after each group.
